# Supplementary material
Source: publisher site journal article supplement (https://www.e-cmh.org/upload/media/cmh-2023-0449-Supplementary-Table-6.pdf)
Supplement: Supplementary file 1 [file cmh-2023-0449-Supplementary-Table-6.pdf]

**Supplementary Table 6.** The accuracy of 64 features through generalized linear regression model

| Gene name    | Acc   |
|--------------|-------|
| CAPG         | 0.82  |
| MCM6         | 0.812 |
| AJUBA        | 0.797 |
| CLDN7        | 0.797 |
| HS3ST2       | 0.797 |
| NALCN        | 0.789 |
| ABCC4        | 0.774 |
| MCM2         | 0.774 |
| GPNMB        | 0.767 |
| TM4SF19      | 0.767 |
| LOC101928304 | 0.759 |
| PLA2G7       | 0.759 |
| TREM2        | 0.759 |
| DHRS9        | 0.752 |
| FABP5        | 0.752 |
| HYAL3        | 0.752 |
| SPP1         | 0.752 |
| LPL          | 0.744 |
| ANXA2        | 0.737 |
| FABP4        | 0.729 |
| LGALS3       | 0.729 |
| FXYD2        | 0.722 |
| BCAT1        | 0.714 |
| CCND1        | 0.714 |
| CEBPD        | 0.714 |
| JUNB         | 0.714 |
| WIPI1        | 0.714 |
| LHFPL2       | 0.699 |
| CEBPB        | 0.692 |
| CILP         | 0.692 |
| NROB2        | 0.684 |
| RORAAS1      | 0.684 |
| DNAJC12      | 0.677 |
| MEOX2        | 0.677 |
| RNASE6       | 0.669 |
| GUCA2B       | 0.662 |
| HIST1H4L     | 0.662 |
| ERRF1        | 0.654 |
| GPC4         | 0.654 |
| HNRNPA1P33   | 0.654 |
| JUN          | 0.654 |

**Supplementary Table 6.** Continued

| Gene name  | Acc   |
|------------|-------|
| LOC727896  | 0.654 |
| SFRP5      | 0.654 |
| ZFP36      | 0.654 |
| RGS2       | 0.639 |
| RGS5       | 0.639 |
| SERPINA3   | 0.639 |
| CLDN4      | 0.632 |
| LINC00939  | 0.632 |
| LOC730101  | 0.632 |
| ZBTB16     | 0.632 |
| ANKRD36BP2 | 0.624 |
| KCNK5      | 0.624 |
| PPP1R1A    | 0.624 |
| MAGOH2P    | 0.617 |
| TIMD4      | 0.617 |
| USP43      | 0.617 |
| FCGR2C     | 0.609 |
| GNAO1      | 0.594 |
| HSPA7      | 0.594 |
| POU6F2     | 0.594 |
| TSC22D3    | 0.594 |
| C1QC       | 0.549 |
| KLHL41     | 0.549 |
